# Supplementary material
Source: PubMed Central journal article supplement (PMC2747022)

## SUPPLEMENTARY MATERIAL

J. Casal, P.A. Lawrence and G. Struhl

### EXPERIMENTAL PROCEDURES

Unless stated otherwise the Flybase (Grumbling et al. 2006) entries of the mutations and transgenes referred in the text are as follows:  $CD2y^+$ : *Rnor*\CD2<sup>hs.PJ</sup>. *hs.FLP*: *Scer*\FLP1<sup>hs.PS</sup>. *act.fz::GFP*: *fz*<sup>P278L.Act5C.T:Avic\GFP-EGFP</sup>. *tub.Gal80*: *Scer*\GAL80<sup>alphaTub84B.PL</sup>. *tub.Gal4*: *Scer*\GAL4<sup>alphaTub84B.PL</sup>. *ptc.Gal4*: *Scer*\Gal4<sup>ptc-559.1</sup>. *UAS.GFP*: *Avic*\GFP<sup>Scer\UAS.T:Hsap\MYC.T:SV40\nls2</sup>. *UAS.fz*: *fz*<sup>Scer\UAS.cZa</sup> and *fz*<sup>Scer\UAS.cSa</sup>. *UAS.ft*: *ft*<sup>Scer\UAS.cMa</sup>. *UAS.ds*: *ds*<sup>Scer\UAS.cTa</sup>. *UAS.fj*: *fj*<sup>Scer\UAS.cZa</sup>. *UAS.Nrt::wg*: *Nrt::wg*<sup>Scer\UAS.T:Ivir\HA1</sup>. *UAS.fz2DN*: *fz2*<sup>GPI.Scer\UAS.T:Hsap\MYC</sup>. *UAS.Wnt2*: *Wnt2*<sup>Scer\UAS.cSa</sup>. *UAS.Wnt4*: *Wnt4*<sup>Scer\UAS.cSa</sup>. *UAS.Wnt6*: *Wnt6*<sup>Scer\UAS.cSa</sup>. *UAS.Wnt8*: *wntD*<sup>Scer\UAS.cSa</sup>. *UAS.Wnt10*: *Wnt10*<sup>Scer\UAS.cSa</sup>. *stan*<sup>3</sup> and *stan*<sup>E59</sup>. *fz*<sup>-</sup>: *fz*<sup>15</sup> or *fz*<sup>21</sup>. *Df(3L)fz2*. *fz2*<sup>-</sup>: *fz2*<sup>C1</sup>. *ds*<sup>38K</sup>. *ds*<sup>-</sup>: *ds*<sup>UA071</sup>. *ft*<sup>12</sup>. *ft*<sup>-</sup>: *ft*<sup>15</sup>. *fj*<sup>N7</sup>. *fj*<sup>-</sup>: *fj*<sup>d1</sup>. *ptc*<sup>-</sup>: *ptc*<sup>IIW</sup>. *en*<sup>-</sup>: *Df(2)en*<sup>E</sup>. FRT39: *P{FRT(w<sup>hs</sup>)}39*. FRT40: *P{neoFRT}40A*. FRT42: *P{neoFRT}42D*. FRT2A: *P{FRT(w<sup>hs</sup>)}2A*. FRT80: *P{neoFRT}80B*. The following are derivatives of *P{UAS-ds.T}* and *P{UAS-ft.M}* (Matakatsu and Blair, 2004), in which the amino acid sequence of the joins are *UAS.ectoDs*: ...**FLFIHMRSRKPR**prp. *UAS.ectoFt*: ...LGSYVIYRFRprprp. *UAS.ectoDs::endoFt*: ...**FLFIHMRSRKPR**GKQEKIGSL.... *UAS.ectoFt::endoDs*: ...LGSYVIYRFRPRNAVKPHLAT... (*ds* sequences in bold, *ft* sequences in italics, added sequences in lower case and transmembrane sequences underlined). *UAS.endoFt*: As in *P{UAS-wg.flu}* (Zecca et al., 1996), the *wg* signal peptide is followed by three copies of the HA1 epitope tag, joined to the Ft transmembrane and cytoplasmic domains. The amino acid sequence at the join is ...[YPYDVPDYA]sAAQVADPLSIGFTLVI... *UAS.endoDs*: ...[YPYDVPDYA]sAGGSSGGSIGDWAIGLL... (sequence in brackets corresponds to the last flu epitope; the beginning of the transmembrane domains of both proteins are underlined).

Clones were induced by heat-shocking third instar larvae for 1 hour at 34, 35 or 37°C. Abdominal cuticles were dissected, mounted in Hoyer's and images captured with Auto-Montage (Syncroscopy) and processed with Adobe Photoshop (Adobe Systems).

**Experimental genotypes**

- (1) **stan<sup>-</sup> fz<sup>-</sup> clones:** y w hs.FLP; FRT42 act.fz::GFP CD2y<sup>+</sup> / FRT42 pwn stan<sup>E59</sup> sha; fz<sup>-</sup> ri FRT2A / fz<sup>-</sup> CD2y<sup>+</sup> ri FRT80
- (2) **tub.Gal4 UAS.stan UAS.fz clones in stan<sup>-</sup>:** y w hs.FLP; 42 stan<sup>3</sup> tub.Gal80 CD2y<sup>+</sup> / FRT42 pwn stan<sup>E59</sup>; UAS.fmi UAS.fz / tub.Gal4
- (3) **tub.Gal4 UAS.fz clones in stan<sup>-</sup>:** y w hs.FLP; FRT42 tub.Gal80 stan<sup>3</sup> CD2y<sup>+</sup> / FRT42 pwn stan<sup>E59</sup>; UAS.fz / tub.Gal4
- (4) **tub.Gal4 UAS.ft clones in stan<sup>-</sup>:** y w hs.FLP; FRT42 tub.Gal80 stan<sup>3</sup> CD2y<sup>+</sup> / FRT42 pwn stan<sup>E59</sup>; UAS.ft / tub.Gal4 and
- (5) y w hs.FLP tub.Gal4 UAS.GFP / y w hs.FLP; FRT42 tub.Gal80 stan<sup>3</sup> CD2y<sup>+</sup> / FRT42 pwn stan<sup>E59</sup>; UAS.ft / +
- (6) **tub.Gal4 UAS.ft clones:** y w hs.FLP / w; FRT42 tub.Gal80 CD2y<sup>+</sup> / FRT42 pwn; UAS.ft / tub.Gal4 and
- (7) y w hs.FLP tub.Gal4 UAS.GFP / y w hs.FLP; FRT42 pwn / ds<sup>-</sup> FRT42 tub.Gal80 CD2y<sup>+</sup>; UAS.ft / + and
- (8) y w hs.FLP; FRT42 pwn / ds<sup>-</sup> FRT42 tub.Gal80 CD2y<sup>+</sup>; UAS.ft / tub.Gal4
- (9) **ft<sup>-</sup> clones in stan<sup>-</sup>:** y w hs.FLP; ft<sup>-</sup> stc FRT39 stan<sup>E59</sup> / CD2y<sup>+</sup> FRT39 stan<sup>3</sup>
- (10) **tub.Gal4 UAS.ds clones:** y w hs.FLP / w; FRT42 tub.Gal80 CD2y<sup>+</sup> / FRT42 pwn; UAS.ds / tub.Gal4
- (11) **tub.Gal4 UAS.ectoDs clones:** y w hs.FLP; FRT42 tub.Gal80 CD2y<sup>+</sup> / FRT42 pwn sha; UAS.ectodDs / tub.Gal4
- (12) **tub.Gal4 UAS.ectoDs clones in stan<sup>-</sup>:** y w hs.FLP tub.Gal4 UAS.GFP / y w hs.FLP; FRT42 pwn stan<sup>E59</sup> sha / FRT42 tub.Gal80 stan<sup>3</sup> CD2y<sup>+</sup>; UAS.ectoDs / +
- (13) **tub.Gal4 UAS.fj clones in stan<sup>-</sup>:** y w hs.FLP tub.Gal4 UAS.GFP; FRT42 tub.Gal80 stan<sup>3</sup> CD2y<sup>+</sup> / FRT42D pwn stan<sup>E59</sup>; UAS.fj / +
- (14) **tub.Gal4 UAS.ft clones in fz<sup>-</sup>:** y w hs.FLP tub.Gal4 UAS.GFP / y w hs.FLP; FRT42 tub.Gal80 CD2y<sup>+</sup>; UAS.ft FRT42 pwn; fz<sup>-</sup> ri FRT2A / fz<sup>-</sup> CD2y<sup>+</sup> ri FRT2A and
- (15) y w hs.FLP tub.Gal4 UAS.GFP / y w hs.FLP; FRT42 tub.Gal80 CD2y<sup>+</sup> / FRT42 pwn sha; fz<sup>-</sup> CD2y<sup>+</sup> UAS.ft / fz<sup>-</sup> ri FRT2A
- (16) **ft<sup>-</sup> clones in fz<sup>-</sup>:** y w hs.FLP; ft<sup>-</sup> stc FRT39 / CD2y<sup>+</sup> FRT39; fz<sup>-</sup> / fz<sup>-</sup> trc FRT2A
- (17) **tub.Gal4 UAS.ectoDs clones in fz<sup>-</sup>:** y w hs.FLP tub.Gal4 UAS.GFP / y w hs.FLP; FRT42 tub.Gal80 CD2y<sup>+</sup> / FRT42 pwn sha; fz<sup>-</sup> CD2y<sup>+</sup> UAS.ectoDs / fz<sup>-</sup> ri FRT2A
- (18) **tub.Gal4 UAS.ft clones in stan<sup>-</sup> fz<sup>-</sup>:** y w hs.FLP tub.Gal4 UAS.GFP / y w hs.FLP; FRT42 pwn stan<sup>E59</sup> sha / FRT42 tub.Gal80 stan<sup>3</sup> CD2y<sup>+</sup>; fz<sup>-</sup> CD2y<sup>+</sup> UAS.ft ri FRT2A / fz<sup>-</sup> CD2y<sup>+</sup> ri FRT80

- (19) **tub.Gal4 UAS.ectoDs clones in stan<sup>-</sup> fz<sup>-</sup>:** y w hs.FLP tub.Gal4 UAS.GFP / y w hs.FLP; FRT42 pwn stan<sup>E59</sup> sha / FRT42 tub.Gal80 stan<sup>3</sup> CD2y<sup>+</sup>; fz<sup>-</sup> CD2y<sup>+</sup> UAS.ectoDs ri FRT2A / fz<sup>-</sup> CD2y<sup>+</sup> ri FRT80
- (20) **fz<sup>-</sup> clones in ds<sup>-</sup>:** y w hs.FLP12; ds<sup>-</sup> FRT39 / In(2LR)bw<sup>V1</sup>; ds<sup>-</sup> trc ri FRT2A / CD2y<sup>+</sup> hs.GFP ri FRT2A
- (21) **tub.Gal4 UAS.fz clones in ds<sup>-</sup>:** y w hs.FLP tub.Gal4 UAS.GFP / y w hs.FLP; ds<sup>-</sup> FRT42 pwn / ds<sup>-</sup> FRT42 Gal.80 CD2y<sup>+</sup>; UAS.fz CD2y<sup>+</sup> / + and
- (22) y w hs.FLP122 tub.Gal4 UAS.GFP / y w hs.FLP122; ds<sup>-</sup> ck FRT40 / ds<sup>-</sup> tub.Gal80 FRT40; UAS.fz fz<sup>-</sup> fz2<sup>C1</sup> FRT2A / +
- (23) **tub.Gal4 UAS.stan clones in ds<sup>-</sup>:** y w hs.FLP tub.Gal4 UAS.GFP / y w hs.FLP; ds<sup>-</sup> FRT42 pwn / ds<sup>-</sup> FRT42 tub.Gal80 CD2y<sup>+</sup>; UAS.stan CD2y<sup>+</sup> / +
- (24) **tub.Gal4 UAS.fz clones in ft<sup>-</sup>:** y w hs.FLP; ft<sup>-</sup> FRT42 pwn sha / ft<sup>12</sup> FRT42 tub.Gal80 CD2y<sup>+</sup>; UAS.fz / tub.Gal4
- (25) **hh.Gal4 UAS.fz in ds<sup>-</sup>:** y w hs.FLP122; ds<sup>-</sup> ck FRT40 / In(2LR)bw<sup>V1</sup>, ds<sup>-</sup>; hh.Gal4 / UAS.fz fz<sup>-</sup> fz2<sup>-</sup> FRT2A
- (26) **2xfz<sup>+</sup> clones in ds<sup>-</sup> / ds<sup>-</sup>; fz<sup>+</sup> / fz<sup>-</sup>:** y w hs.FLP; ds<sup>-</sup>; CD2y<sup>+</sup> trc ri FRT2A / fz<sup>-</sup> Df(3L)fz2 FRT2A
- (27) **fz<sup>-</sup> tub.Gal4 UAS.ft clones:** y w hs.FLP tub.Gal4 UAS.GFP / y w hs.FLP; UAS.ft FRT42 pwn; tub.Gal80 FRT2A / fz<sup>-</sup> trc ri
- (28) **tub.Gal4 UAS.fz clones in ds<sup>-</sup> fz<sup>-</sup>:** y w hs.FLP tub.Gal4 UAS.GFP / y w hs.FLP; ds<sup>-</sup> FRT42 sha / ds<sup>-</sup> FRT42 tub.Gal80 CD2y<sup>+</sup>; fz<sup>-</sup> CD2y<sup>+</sup> ri FRT2A UAS.fz / fz<sup>-</sup> CD2y<sup>+</sup> ri FRT80
- (29) **tub.Gal4 UAS.ectoDs in ds<sup>-</sup>:** y w hs.FLP tub.Gal4 UAS.GFP / y w hs.FLP; ds<sup>-</sup> tub.Gal80 FRT40 / ds ck FRT40; UAS.ectoDs / + and
- (30) y w FL122; ds<sup>-</sup> CD2y<sup>+</sup> FRT42 pwn sha / ds<sup>-</sup> FRT42 tub.Gal80 CD2y<sup>+</sup>; UAS.ectoDs / tub.Gal4
- (31) **tub.Gal4 UAS.ds in ds<sup>-</sup>:** y w hs.FLP tub.Gal4 UAS.GFP / y w hs.FLP; ds<sup>-</sup> tub.Gal80 FRT40 / ds ck FRT40; UAS.ds / + and
- (32) y w hs.FLP tub.Gal4 UAS.GFP / y w hs.FLP; ds<sup>-</sup> FRT42 pwn / ds<sup>-</sup> FRT42 tub.Gal80 CD2y<sup>+</sup>; UAS.ds / +
- (33) **tub.Gal4 UAS.ft in ds<sup>-</sup>:** y w hs.FLP tub.Gal4 UAS.GFP / y w hs.FLP; ds<sup>-</sup> tub.Gal80 FRT40 / ds<sup>-</sup> ck FRT40; UAS.ft / + and
- (34) y w hs.FLP tub.Gal4 UAS.GFP / y w hs.FLP; ds<sup>-</sup> FRT42 pwn / ds<sup>-</sup> FRT42 tub.Gal80 CD2y<sup>+</sup>; UAS.ft / +
- (35) **tub.Gal4 UAS.ectoDs clones in ft<sup>-</sup>:** y w hs.FLP; ft<sup>-</sup> FRT42 pwn sha / ft<sup>12</sup> FRT42 tub.Gal80 CD2y<sup>+</sup>; UAS.ft / tub.Gal4
- (36) **tub.Gal4 UAS.ft clones in ft<sup>-</sup>:** y w hs.FLP; ft<sup>-</sup> FRT42 pwn sha / ft<sup>12</sup> FRT42 tub.Gal80 CD2y<sup>+</sup>; UAS.ft / tub.Gal4

- (37) **tub.Gal4 UAS.fz UAS.ft clones in ds<sup>-</sup>:** y w hs.FLP; ds<sup>-</sup> CD2y<sup>+</sup> FRT42 pwn sha / ds<sup>-</sup> FRT42 tub.Gal80 CD2y<sup>+</sup>; UAS.fz UAS.ft / tub.Gal4
- (38) **tub.Gal4 UAS.fz UAS.ds clones in ds<sup>-</sup>:** y w hs.FLP; ds<sup>-</sup> CD2y<sup>+</sup> FRT42 pwn sha / ds<sup>-</sup> FRT42 tub.Gal80 CD2y<sup>+</sup>; UAS.fz UAS.ds / tub.Gal4
- (39) **tub.Gal4 UAS.ft UAS.fz clones in ft<sup>-</sup>:** y w hs.FLP; ft<sup>-</sup> FRT42 pwn sha / ft<sup>12</sup> FRT42 tub.Gal80 CD2y<sup>+</sup>; CD2y<sup>+</sup> UAS.ft UAS.fz / tub.Gal4
- (40) **tub.Gal4 UAS.ectoDs UAS.fz clones in ft<sup>-</sup>:** y w hs.FLP; ft<sup>-</sup> FRT42 pwn sha / ft<sup>12</sup> FRT42 tub.Gal80 CD2y<sup>+</sup>; CD2y<sup>+</sup> UAS.ectoDs UAS.fz / tub.Gal4
- (41) **stan<sup>-</sup>:** y w hs.FLP / +; stan<sup>3</sup> / ds<sup>-</sup> CD2y<sup>+</sup> FRT42 pwn stan<sup>E59</sup> sha
- (42) **ds<sup>-</sup>:** y w hs.FLP; ds<sup>-</sup> tub.Gal80 FRT40 / ds<sup>-</sup> CD2y<sup>+</sup> FRT42 pwn stan<sup>E59</sup> sha
- (43) **ds<sup>-</sup> stan<sup>-</sup>:** y w hs.FLP tub.Gal4 UAS.GFP / y w hs.FLP; ds<sup>-</sup> tub.Gal80 FRT40 / ds<sup>-</sup> CD2y<sup>+</sup> FRT42 pwn stan<sup>E59</sup> sha
- (44) **ds<sup>-</sup> ft<sup>-</sup> clones:** y w hs.FLP / y; ds<sup>-</sup> ft<sup>-</sup> stc FRT39 / CD2y<sup>+</sup> FRT39
- (45) **ds<sup>-</sup> ft<sup>-</sup> tub.Gal4 UAS.ds clones:** y w hs.FLP; ds<sup>-</sup> ft<sup>-</sup> stc FRT39 / tub.Gal80 CD2y<sup>+</sup> FRT39; UAS.ds / tub.Gal4
- (46) **ds<sup>-</sup> ft<sup>-</sup> tub.Gal4 UAS.ft clones:** y w hs.FLP; ds<sup>-</sup> ft<sup>-</sup> stc FRT39 / tub.Gal80 CD2y<sup>+</sup> FRT39; UAS.ft / tub.Gal4
- (47) **ds<sup>-</sup> tub.Gal4 UAS.ectoDs clones:** y w hs.FLP; ds<sup>-</sup> stc FRT39 / tub.Gal80 CD2y<sup>+</sup> FRT39; UAS.ectoDs / tub.Gal4
- (48) **ft<sup>-</sup> tub.Gal4 UAS.ectoDs clones:** y w hs.FLP; ft<sup>-</sup> stc FRT39 / tub.Gal80 CD2y<sup>+</sup> FRT39; UAS.ectoDs / tub.Gal4
- (49) **ds<sup>-</sup> ft<sup>-</sup> tub.Gal4 UAS.ectoDs clones:** y w hs.FLP; ds<sup>-</sup> ft<sup>-</sup> stc FRT39 / tub.Gal80 CD2y<sup>+</sup> FRT39; UAS.ectoDs / tub.Gal4
- (50) **tub.Gal4 UAS.ectoFt clones:** y w hs.FLP; FRT42 pwn sha / FRT42 tub.Gal80 CD2y<sup>+</sup>; UAS.ectoFt / tub.Gal4
- (51) **ft<sup>-</sup> tub.Gal4 UAS.ft clones:** y w hs.FLP; ft<sup>-</sup> stc FRT39 / tub.Gal80 CD2y<sup>+</sup> FRT39; UAS.ft / tub.Gal4
- (52) **ft<sup>-</sup> tub.Gal4 UAS.ectoFt clones:** y w hs.FLP; ft<sup>-</sup> stc FRT39 / tub.Gal80 CD2y<sup>+</sup> FRT39; UAS.ectoFt / tub.Gal4
- (53) **ds<sup>-</sup> ft<sup>-</sup> tub.Gal4 UAS.ectoFt clones:** y w hs.FLP; ds<sup>-</sup> ft<sup>-</sup> stc FRT39 / tub.Gal80 CD2y<sup>+</sup> FRT39; UAS.ectoFt / tub.Gal4
- (54) **tub.Gal4 UAS.ectoDs::endoFt clones:** y w hs.FLP; FRT42 pwn sha / FRT42 tub.Gal80 CD2y<sup>+</sup>; UAS.ectoDs::endoFt / tub.Gal4
- (55) **ds<sup>-</sup> tub.Gal4 UAS.ectoDs::endoFt clones:** y w hs.FLP; ds<sup>-</sup> stc FRT39 / tub.Gal80 CD2y<sup>+</sup> FRT39; UAS.ectoDs::endoFt / tub.Gal4
- (56) **ft<sup>-</sup> tub.Gal4 UAS.ectoDs::endoFt clones:** y w hs.FLP; ft<sup>-</sup> stc FRT39 / tub.Gal80 CD2y<sup>+</sup>

FRT39; UAS. ectoDs::endoFt/ tub.Gal4

- (57) **ds<sup>-</sup> ft<sup>-</sup> tub.Gal4 UAS.ectoDs::endoFt clones:** y w hs.FLP; ds<sup>-</sup> ft<sup>-</sup> stc FRT39/ tub.Gal80 CD2y<sup>+</sup> FRT39; UAS. ectoDs::endoFt/ tub.Gal4
- (58) **tub.Gal4 UAS.ectoFt::endoDs clones:** y w hs.FLP; FRT42 pwn sha/ FRT42 tub.Gal80 CD2y<sup>+</sup>; UAS.ectoFt::endoDs/ tub.Gal4
- (59) **ds<sup>-</sup> tub.Gal4 UAS.ectoFt::endoDs clones:** y w hs.FLP; ds<sup>-</sup> stc FRT39/ tub.Gal80 CD2y<sup>+</sup> FRT39; UAS.ectoFt::endoDs/ tub.Gal4
- (60) **ft<sup>-</sup> tub.Gal4 UAS. ectoFt::endoDs clones:** y w hs.FLP; ft<sup>-</sup> stc FRT39/ tub.Gal80 CD2y<sup>+</sup> FRT39; UAS.ectoFt::endoDs/ tub.Gal4
- (61) **ds<sup>-</sup> ft<sup>-</sup> tub.Gal4 UAS. ectoFt::endoDs clones:** y w hs.FLP; ds<sup>-</sup> ft<sup>-</sup> stc FRT39/ tub.Gal80 CD2y<sup>+</sup> FRT39; UAS.ectoFt::endoDs/ tub.Gal4
- (62) **ptc.Gal4 UAS.endoDs:** y w hs.FLP; Sp/ fj<sup>-</sup> ptc.Gal4; UAS.endoDs/ +
- (63) **ptc.Gal4 UAS.endoFt:** y w hs.FLP; Sp/ fj<sup>-</sup> ptc.Gal4; UAS.endoFt/ +
- (64) **ds<sup>-</sup> fj<sup>-</sup>:** ds<sup>-</sup> fj<sup>-</sup> / ds<sup>38K</sup> fj<sup>N7</sup>
- (65) **tub.Gal4 UAS.fj clones in ds<sup>-</sup>:** y w hs.FLP tub.Gal4 UAS.GFP/ y w hs.FLP; ds<sup>-</sup> tub.Gal80 FRT40/ ds<sup>-</sup> ck FRT40 UAS.fj
- (66) **ft<sup>-</sup> tub.Gal4 UAS.fj clones:** y w hs.FLP; ft<sup>-</sup> stc FRT39/ tub.G80 CD2y<sup>+</sup> FRT39; UAS.fj/ tub.Gal4
- (67) **ds<sup>-</sup> ft<sup>-</sup> tub.Gal4 UAS.fj clones:** y w hs.FLP; ds<sup>-</sup> ft<sup>-</sup> stc FRT39/ tub.G80 CD2y<sup>+</sup> FRT39; UAS.fj/ tub.Gal4
- (68) **ds<sup>-</sup> tub.Gal4 UAS.fj clones:** y w hs.FLP tub.Gal4 UAS.GFP/ y w hs.FLP; tub.Gal80 FRT40/ ds<sup>-</sup> ck FRT40 UAS.fj
- (69) **tub.Gal4 UAS.fj UAS.ds clones:** y w hs.FLP tub.Gal4 UAS.GFP/ y w hs.FLP; FRT42 tub.Gal80 CD2y<sup>+</sup> / FRT42D pwn UAS.fj; UAS.ds/ +
- (70) **tub.Gal4 UAS.fj UAS.ectoDs clones:** y w hs.FLP tub.Gal4 UAS.GFP/ y w hs.FLP; FRT42 tub.Gal80 CD2y<sup>+</sup> / FRT42D pwn UAS.fj; UAS.ectoDs / +
- (71) **tub.Gal4 UAS.ft UAS.ds clones:** y w hs.FLP122 tub.Gal4 UAS.GFP/ y w hs.FLP; FRT42 tub.Gal80/ FRT42 pwn; UAS.ft/ UAS.ds
- (72) **tub.Gal4 UAS.ft UAS.ectoDs clones:** y w hs.FLP tub.Gal4 UAS.GFP/ y w hs.FLP; FRT42 tub.Gal80/ FRT42D pwn sha; UAS.ft/ UAS.ectoDs
- (73) **tub.Gal4 UAS.ft clones in fj<sup>-</sup>:** y w hs.FLP tub.Gal4 UAS.GFP/ y w hs.FLP; FRT42 pwn fj<sup>-</sup> / FRT42 tub.Gal80 fj<sup>-</sup>; UAS.ft/ +
- (74) **tub.Gal4 UAS.ectoDs clones in fj<sup>-</sup>:** y w hs.FLP tub.Gal4 UAS.GFP/ y w hs.FLP; FRT42 pwn fj<sup>-</sup> / FRT42 tub.Gal80 fj<sup>-</sup>; UAS.ectoDs/ +
- (75) **tub.Gal4 UAS.ds clones in fj<sup>-</sup>:** y w hs.FLP tub.Gal4 UAS.GFP/ y w hs.FLP; FRT42 pwn fj<sup>-</sup> / FRT42 tub.Gal80 fj<sup>-</sup>; UAS.ds/ +

- (76) **ptc<sup>-</sup> en<sup>-</sup> clones in stan<sup>-</sup>:** y w hs.FLP tub.Gal4 UAS.GFP/ y w hs.FLP; ds<sup>-</sup> CD2y<sup>+</sup> FRT42 pwn ptc<sup>-</sup> stan<sup>E59</sup> en<sup>-</sup> / ds<sup>-</sup> FRT42 tub.Gal80 stan<sup>3</sup> CD2y<sup>+</sup>
- (77) **ptc<sup>-</sup> en<sup>-</sup> clones in fz<sup>-</sup>:** y w hs.FLP tub.Gal4 UAS.GFP/ y w hs.FLP; FRT42 pwn cn ptc<sup>-</sup> en<sup>-</sup> / FRT42 tub.Gal80; fz<sup>-</sup> CD2y<sup>+</sup> ri FRT2A/ fz<sup>-</sup> ri FRT2A
- (78) **ptc<sup>-</sup> en<sup>-</sup> clones in ds<sup>-</sup>:** y w hs.FLP/ w; ds<sup>-</sup> FRT42 CD2y<sup>+</sup>/ ds<sup>-</sup> FRT42 pwn ptc<sup>-</sup> en<sup>-</sup>
- (79) **ptc<sup>-</sup> en<sup>-</sup> clones in ds<sup>-</sup> stan<sup>-</sup>:** y w hs.FLP tub.Gal4 UAS.GFP/ y w hs.FLP; ds<sup>-</sup> CD2y<sup>+</sup> FRT42 pwn ptc<sup>-</sup> stan<sup>E59</sup> en<sup>-</sup> / ds<sup>-</sup> FRT42 tub.Gal80 stan<sup>3</sup> CD2y<sup>+</sup>
- (80) **tub.Gal4 UAS.wg clones in ds<sup>-</sup>:** y w hs.FLP; ds<sup>-</sup> ck FRT40/ ds<sup>-</sup> tub.Gal80 FRT40; UAS.wg/ + and
- (81) y w hs.FLP; ds<sup>-</sup> FRT42 pwn sha/ ds<sup>-</sup> FRT42 tub.Gal80 CD2y<sup>+</sup>; UAS.wg/ tub.Gal4
- (82) **tub.Gal4 UAS.Nrt::wg clones in ds<sup>-</sup>:** y w hs.FLP; ds<sup>-</sup> ck FRT40/ ds<sup>-</sup> tub.Gal80 FRT40; UAS.Nrt::wg/ +
- (83) **tub.Gal4 UAS.fz2DN clones in ds<sup>-</sup>:** y w hs.FLP; ds<sup>-</sup> ck FRT40/ ds<sup>-</sup> tub.Gal80 FRT40; UAS.fz2DN/ +
- (84) **tub.Gal4 UAS.Wnt2 clones in ds<sup>-</sup>:** y w hs.FLP; ds<sup>-</sup> ck FRT40/ ds<sup>-</sup> tub.Gal80 FRT40; UAS.Wnt2/ + and
- (85) y w hs.FLP; ds<sup>-</sup> FRT42 pwn sha/ ds<sup>-</sup> FRT42 tub.Gal80 CD2y<sup>+</sup>; UAS.Wnt2/ tub.Gal4
- (86) **tub.Gal4 UAS.Wnt3 clones in ds<sup>-</sup>:** y w hs.FLP; ds<sup>-</sup> FRT42 pwn sha/ ds<sup>-</sup> FRT42 tub.Gal80 CD2y<sup>+</sup>; UAS.Wnt3/ tub.Gal4
- (87) **tub.Gal4 UAS.Wnt4 clones in ds<sup>-</sup>:** y w hs.FLP; ds<sup>-</sup> ck FRT40/ ds<sup>-</sup> tub.Gal80 FRT40; UAS.Wnt4/ + and
- (88) y w hs.FLP; ds<sup>-</sup> FRT42 pwn sha/ ds<sup>-</sup> FRT42 tub.Gal80 CD2y<sup>+</sup>; UAS.Wnt4/ tub.Gal4
- (89) **tub.Gal4 UAS.Wnt6 clones in ds<sup>-</sup>:** y w hs.FLP; ds<sup>-</sup> FRT42 pwn sha/ ds<sup>-</sup> FRT42 tub.Gal80 CD2y<sup>+</sup>; UAS.Wnt6/ tub.Gal4
- (90) **tub.Gal4 UAS.Wnt8 clones in ds<sup>-</sup>:** y w hs.FLP; ds<sup>-</sup> FRT42 pwn sha/ ds<sup>-</sup> FRT42 tub.Gal80 CD2y<sup>+</sup>; UAS.Wnt8/ tub.Gal4
- (91) **tub.Gal4 UAS.Wnt10 clones in ds<sup>-</sup>:** y w hs.FLP; ds<sup>-</sup> FRT42 pwn sha/ ds<sup>-</sup> FRT42 tub.Gal80 CD2y<sup>+</sup>; UAS.Wnt10/ tub.Gal4
- (92) **ptc<sup>-</sup> en<sup>-</sup> stan<sup>-</sup> clones in ds<sup>-</sup>:** y w hs.FLP; ds<sup>-</sup> FRT42 pwn ptc<sup>-</sup> en<sup>-</sup> stan<sup>E59</sup> / ds<sup>-</sup> FRT42 tub.Gal80; tub.Gal4/ +

## References

**G. Grumbling, V. Strelets and The FlyBase Consortium** (2006). FlyBase: anatomical data, images and queries. *Nucleic Acids Research* 34: D484-D488; doi:10.1093/nar/gkj068.  
<http://flybase.org/>

**Matakatsu, H. and Blair, S. S.** (2004). Interactions between Fat and Dachous and the

regulation of planar cell polarity in the *Drosophila* wing. *Development*.

**Zecca, M., Basler, K. and Struhl, G.** (1996). Direct and long-range action of a wingless morphogen gradient. *Cell* 87, 833-844

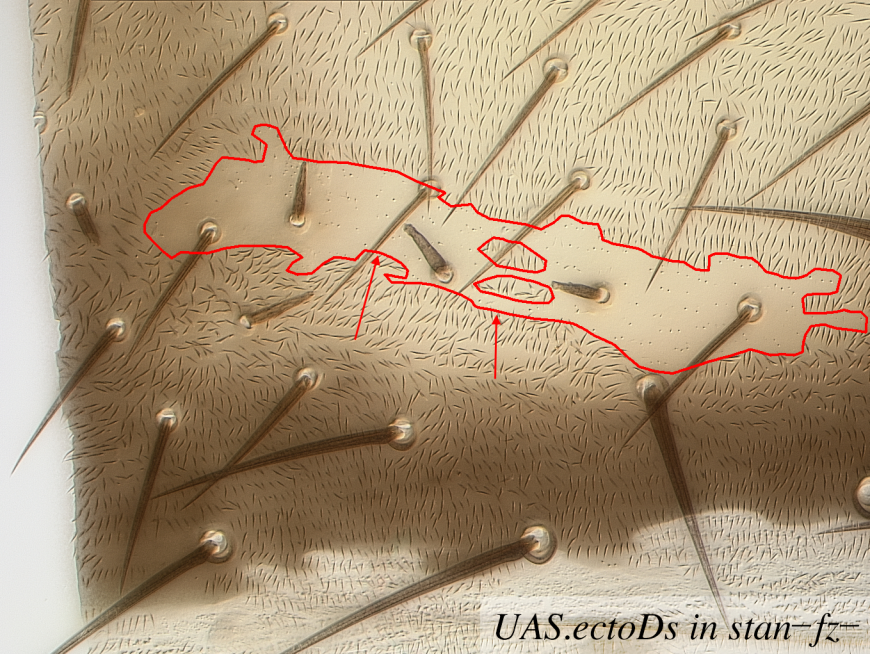

*UAS.ectoDs* in *stan<sup>-</sup> fz<sup>-</sup>*

### Supplementary Figure 1

A clone expressing *UAS.ectoDs* in a *stan<sup>-</sup> fz<sup>-</sup>* fly. Note the repolarisation behind the clone is comparable with the repolarisation illustrated in Fig 2F and 3C in the main text.



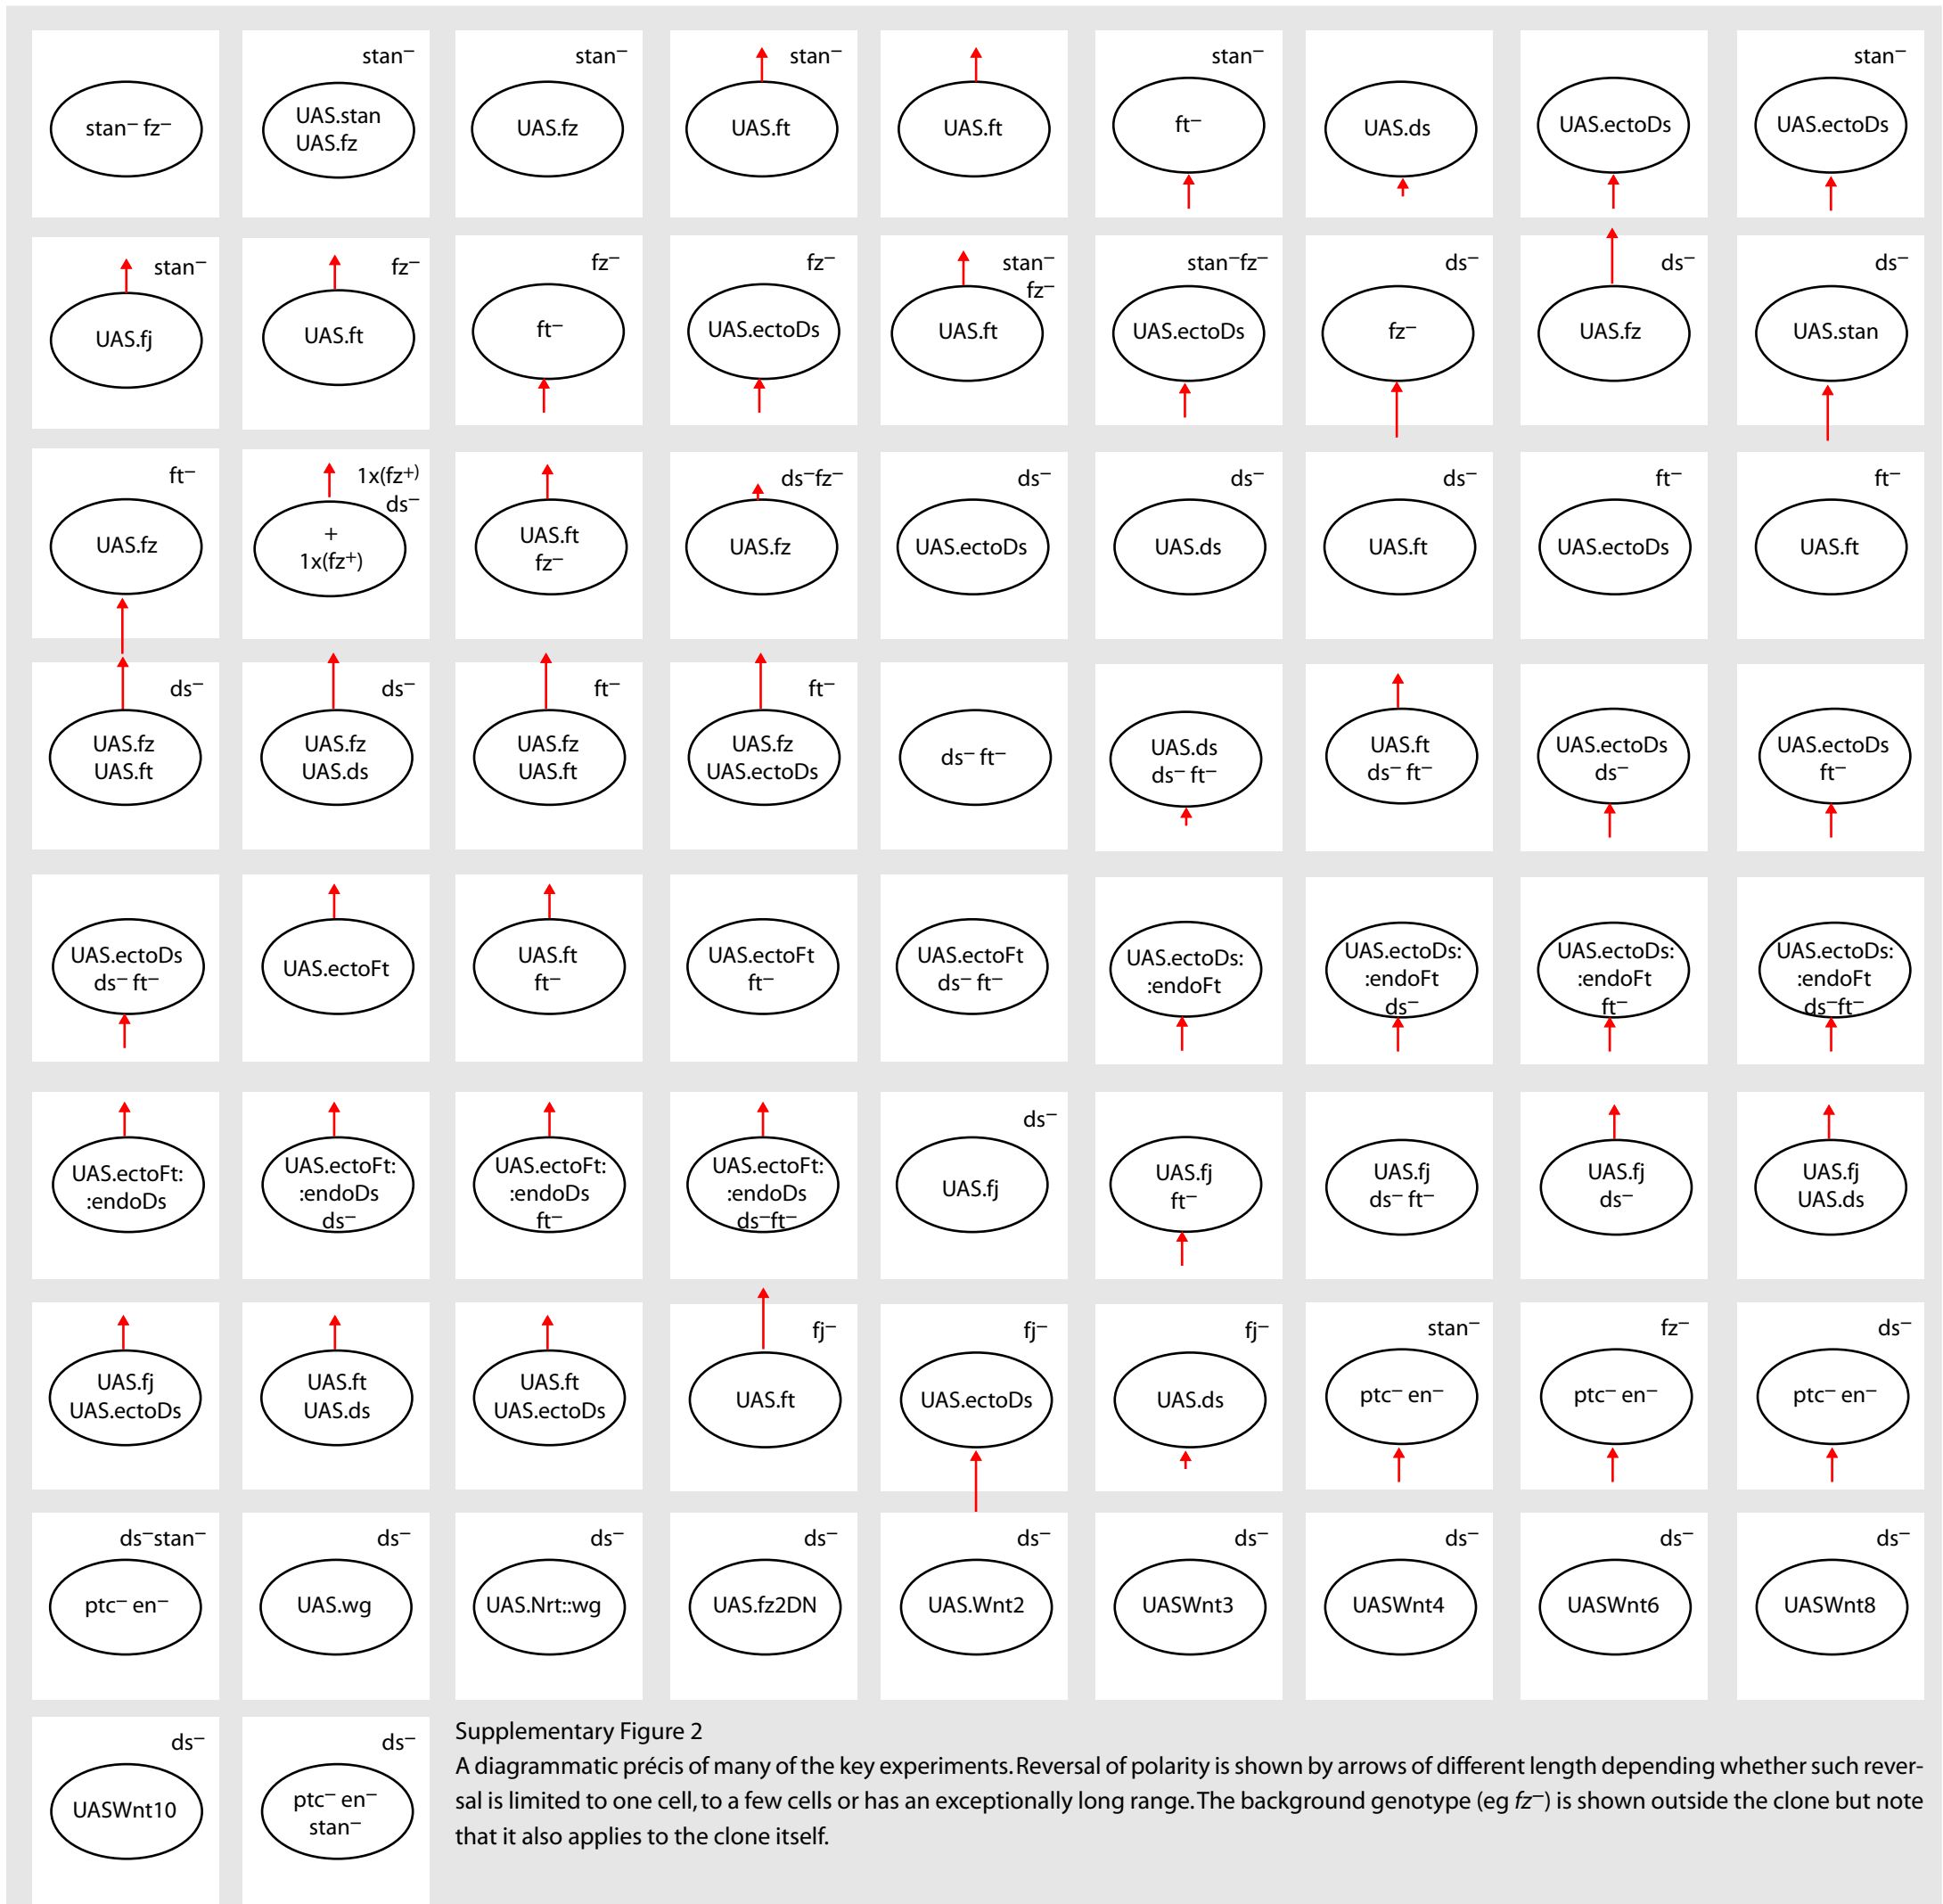

Supplement: NIHMS27665-supplement-supplementary_data.pdf [file NIHMS27665-supplement-supplementary_data.pdf]
